# Supplementary material for: Self-assembly of strawberry-like organic–inorganic hybrid particle clusters with directionally distributed bimetal and facile transformation of the core and corona
Source: Royal Society of Chemistry journal article supplement (doi:10.1039/d0py00237b), 2020-01-01
Supplement: d0py00237b1.pdf [file d0py00237b1.pdf]

## Supporting information

### Self-assembly Enabling Strawberry-like Organic-Inorganic Hybrid Particles Clusters with Directionally Distributed Bimetal and Facile Transformation of Core & Corona

Shuxing Mei<sup>a</sup>, Mingwang Pan<sup>a,b\*</sup>, Juan Wang<sup>a</sup>, Xiaopeng Zhang<sup>a</sup>, Shaofeng Song<sup>a</sup>, Chao Li<sup>a</sup>, and Gang Liu<sup>a,b</sup>

<sup>a</sup>Institute of Polymer Science and Engineering, Hebei University of Technology, Tianjin 300130, PR China

<sup>b</sup>Hebei Key Laboratory of Functional Polymers, Hebei University of Technology, Tianjin 300130, PR China. \*Corresponding author: mwpan@126.com

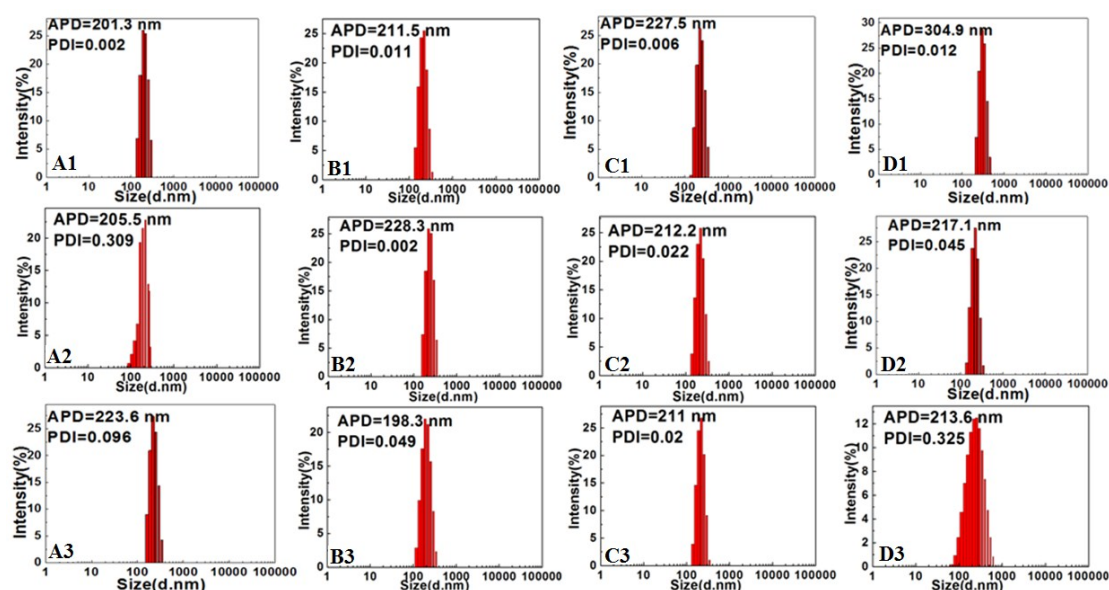

Figure S1 Average sizes and size distributions of P(St-co-GMA-co-VBA) copolymer particles

A1 : P(S<sub>0.1</sub>G<sub>0.4</sub>V<sub>0.05</sub>), B1 : P(S<sub>0.1</sub>G<sub>0.4</sub>V<sub>0.10</sub>), C1 : P(S<sub>0.1</sub>G<sub>0.4</sub>V<sub>0.15</sub>), D1 : P(S<sub>0.1</sub>G<sub>0.4</sub>V<sub>0.20</sub>);  
A2 : P(S<sub>0.6</sub>G<sub>0.4</sub>V<sub>0.05</sub>), B2 : P(S<sub>0.6</sub>G<sub>0.4</sub>V<sub>0.10</sub>), C2 : P(S<sub>0.6</sub>G<sub>0.4</sub>V<sub>0.15</sub>), D2 : P(S<sub>0.6</sub>G<sub>0.4</sub>V<sub>0.20</sub>);  
A3 : P(S<sub>1.0</sub>G<sub>0.4</sub>V<sub>0.05</sub>), B3 : P(S<sub>1.0</sub>G<sub>0.4</sub>V<sub>0.10</sub>), C3 : P(S<sub>1.0</sub>G<sub>0.4</sub>V<sub>0.15</sub>), D3 : P(S<sub>1.0</sub>G<sub>0.4</sub>V<sub>0.20</sub>).

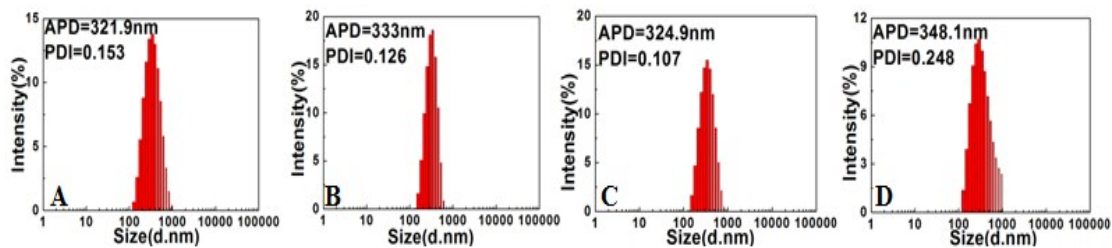

Figure S2 Average sizes and size distributions of  $P(S_xG_yV_z)@SiO_2&Au$  and  $P(S_xG_yV_z)&Ag@SiO_2&Au$  particles ( $x=0.6, y=0.4, z=0.05/0.1$ ). A:  $P(S_{0.6}G_{0.4}V_{0.05})@SiO_2&Au$ , B:  $P(S_{0.6}G_{0.4}V_{0.05})&Ag@SiO_2&Au$ , C:  $P(S_{0.6}G_{0.4}V_{0.1})@SiO_2&Au$ , D:  $P(S_{0.6}G_{0.4}V_{0.1})&Ag@SiO_2&Au$ .

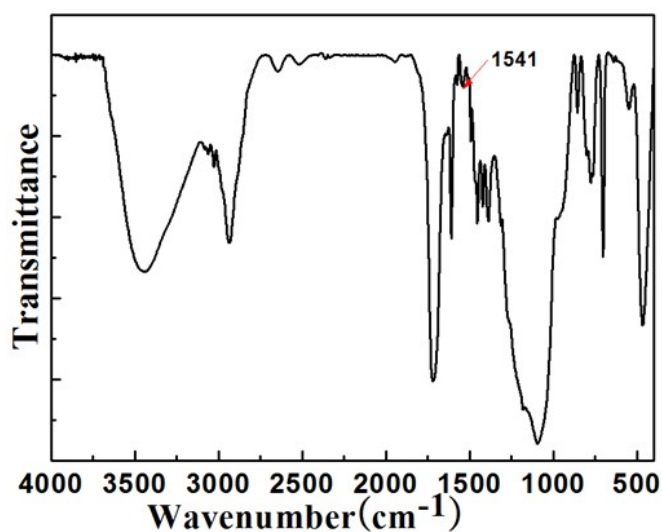

Figure S3 FTIR spectrum of the  $P(S_{0.6}G_{0.4}V_{0.1})@SiO_2&Au$  NPs

EDS Spot 1

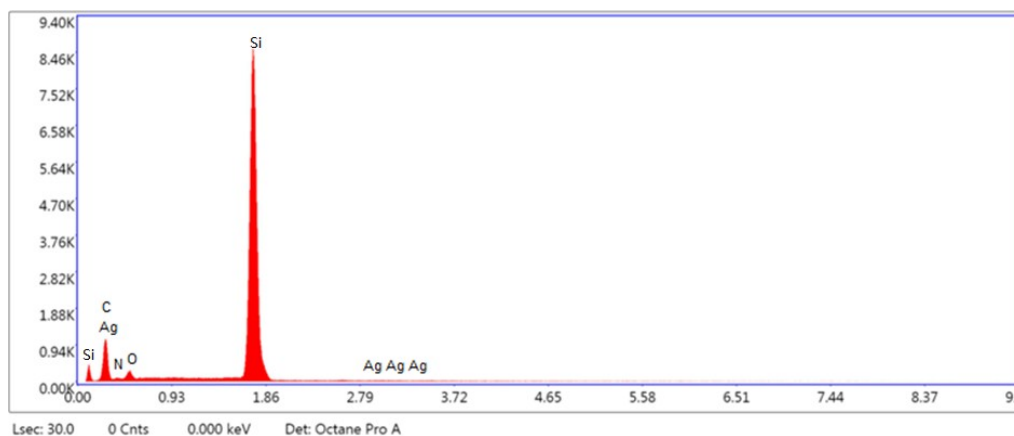

EDS Spot 2

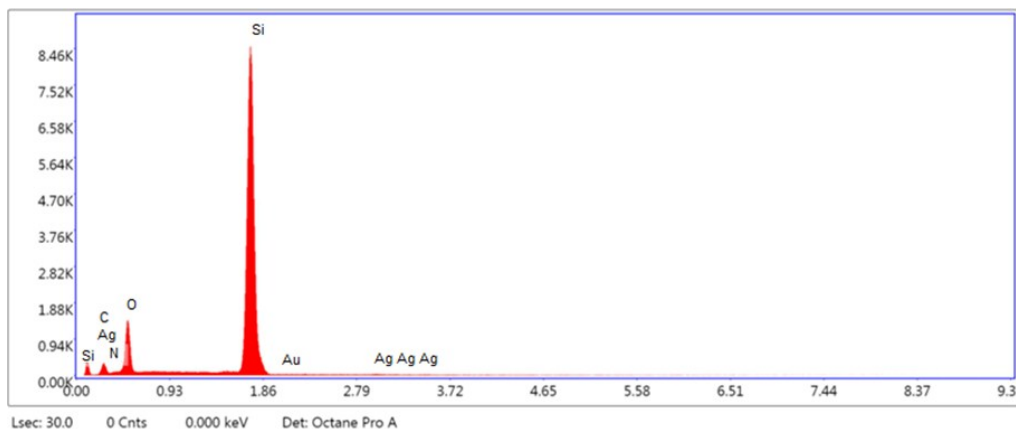

Figure S4 EDS spectra of corresponding spot 1 and spot 2 of  $P(S_{0.6}G_{0.4}V_{0.1})@Ag@SiO_2&Au$  NPs

Table S1 Apparent rate constants of three catalysts with different volumes of catalyst solution

| Catalyst type                                                           | Addition volume of catalyst solution (mL) ** | K (min <sup>-1</sup> ) |
|-------------------------------------------------------------------------|----------------------------------------------|------------------------|
| $SiO_2&Au$<br>(Au wt%=1.61%)                                            | 0.5                                          | 0.09                   |
|                                                                         | 1.0                                          | 0.15                   |
|                                                                         | 1.5                                          | 0.19                   |
|                                                                         | 2.0                                          | 0.36                   |
|                                                                         | 2.5                                          | 0.59                   |
| $P(S_{0.6}G_{0.4}V_{0.10})@SiO_2&Au$<br>(Au wt%=0.59%)                  | 0.5                                          | 0.18                   |
|                                                                         | 1.0                                          | 0.24                   |
|                                                                         | 1.5                                          | 0.30                   |
|                                                                         | 2.0                                          | 0.39                   |
| $P(S_{0.6}G_{0.4}V_{0.10})@Ag@SiO_2&Au$<br>(Au wt%=0.23%, Ag wt%=2.37%) | 2.5                                          | 0.68                   |
|                                                                         | 0.5                                          | 0.29                   |
|                                                                         | 1.0                                          | 0.49                   |
|                                                                         | 1.5                                          | 0.50                   |
|                                                                         | 2.0                                          | 1.97                   |
|                                                                         | 2.5                                          | 2.20                   |

\*\*Reaction conditions: Using 10 mL of RhB ( $2 \times 10^{-5}$  mol/L), 0.5 mL of  $NaBH_4$  (1.2 mol/L) solutions and keeping the same Au concentration through adding different volume water in the varying catalyst dispersions.
